# Supplementary material
Source: Research Square preprint supplement (doi:10.21203/rs.3.rs-6811285/v1)
Supplement: Supplementary file 1 [file d65e73e32a95e025254d3e7c.docx]

**Supplementary Information for**

**Mining Natural Microbial Diversity for Tool-Compatible Chassis Discovery**

Min Jae Kim1†, Minsun Kim 2†, Jun Hyeok Choi3, Myung Hyun Noh2,
Hyun Gyu Lim3,*, Gyoo Yeol Jung1,2*

1Department of Chemical Engineering, Pohang University of Science and Technology, 77 Cheongam-Ro, Nam-Gu, Pohang, Gyeongbuk 37673, Republic of Korea

2Center for Bio-based Chemistry, Korea Research Institute of Chemical Technology (KRICT), 406-30 Jongga-Ro, Jung-Gu, Ulsan, 44429, Republic of Korea

3Department of Biological Sciences and Bioengineering, Inha University, 100 Inha-Ro, Michuhol-Gu, Incheon 22212, Republic of Korea

†These authors contributed equally to this work

*Corresponding authors: Hyun Gyu Lim and Gyoo Yeol Jung

Department of Chemical Engineering, Pohang University of Science and Technology, 77 Cheongam-Ro, Nam-Gu, Pohang, Gyeongbuk 37673, Republic of Korea

Tel.: +82 54-279-2391, Fax: +82 54-279-5528
E-mail: [hyungyu.lim@inha.ac.kr](mailto:hyungyu.lim@inha.ac.kr) (H.G.L.) [gyjung@postech.ac.kr](mailto:gyjung@postech.ac.kr) (G.Y.J)

# Supplementary Figures

##
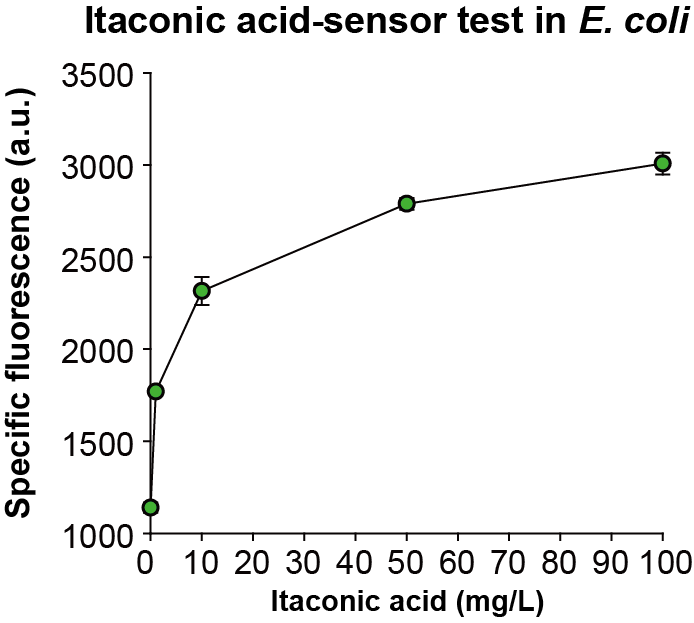


## Supplementary Figure 1. Validation of the itaconic acid-responsive biosensor in *Escherichia coli*

Specific fluorescence of W-SENS strain with itaconic acid supplementation (0, 1, 10, 50, 100 mg/L) in MSM medium with 4 g/L of glucose.

##
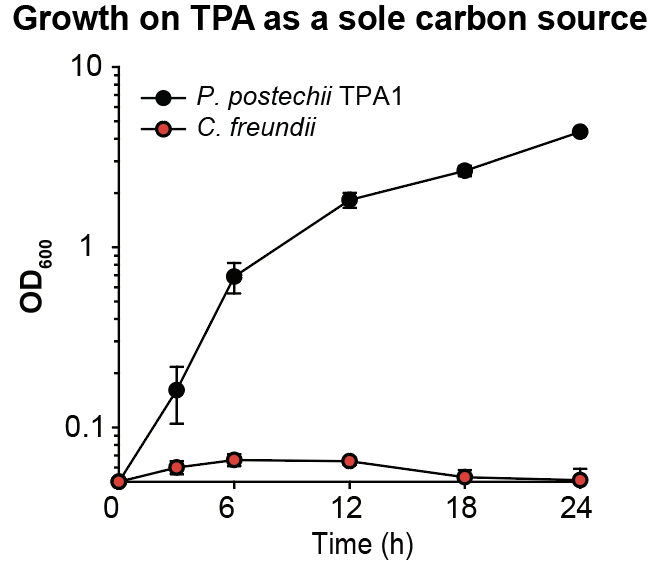


## Supplementary Figure 2. Growth comparison of *Pseudomonas postechii* TPA1 and isolated *Citrobacter freundii* on TPA as a sole carbon source

Growth profiles of TPA1 (black) and *C. freundii* (red) in a minimal medium with TPA as the sole carbon source (66 mM). No significant growth was observed for *C. freundii*. Error bars represent the standard deviations from three independent cultures (*n* = 3).

##
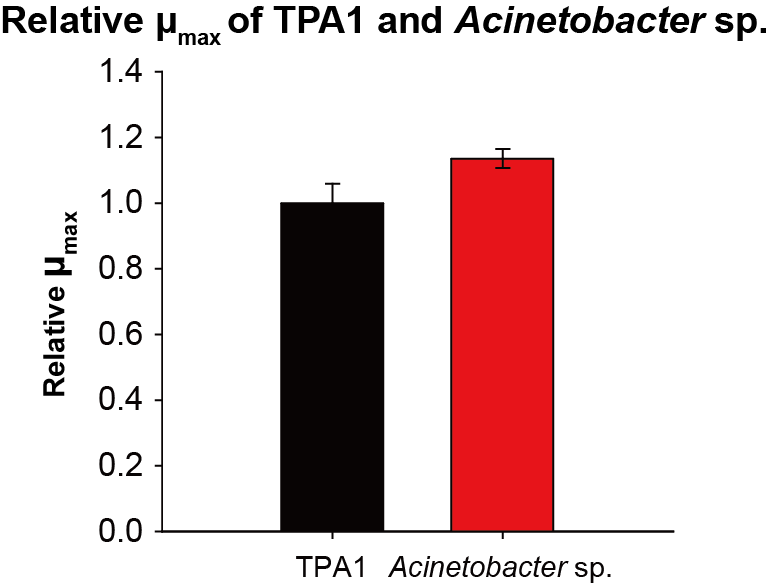


## Supplementary Figure 3. Relative growth rates of *Pseudomonas postechii* TPA1 and isolated *Acinetobacter* species

Relative growth rates of *Pseudomonas postechii* TPA1 and an *Acinetobacter* sp. isolated from the conventional growth-based selection were calculated during the exponential phase (3–6 h) of a 3 mL test tube culture of MSM medium supplemented with 66 mM TPA. The growth rate of the *Acinetobacter* sp was normalized using the TPA1 as a reference, showing a 1.1-fold higher growth rate than the control. Error bar indicates the standard deviations of three independent cultures (*n* = 3).


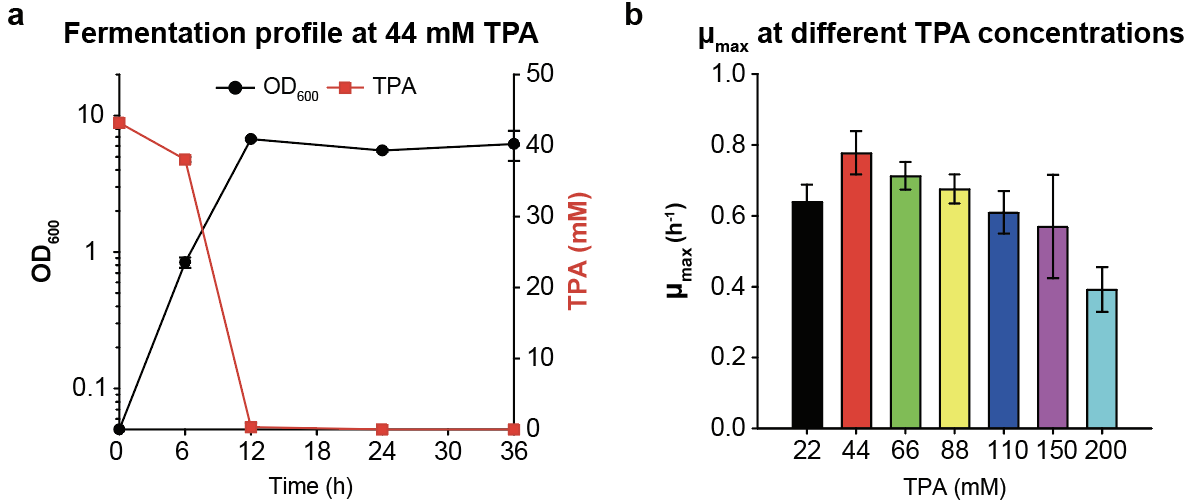


## Supplementary Figure 4. Comparison of the cell growth of *Pseudomonas postechii* TPA1 on various concentrations of TPA

**a** Fermentation profile of *Pseudomonas postechii* TPA1 grown in a minimal medium supplemented with 44 mM TPA. **b** Maximum growth rate (μmax, h-1) of *Pseudomonas postechii* TPA1 at various TPA concentrations (22, 44, 66, 88, 110, 150, 200 mM). μmax was calculated during the exponential phase of TPA1 (3–6 h). Error bar indicates the standard deviations of three independent cultures (*n* = 3).


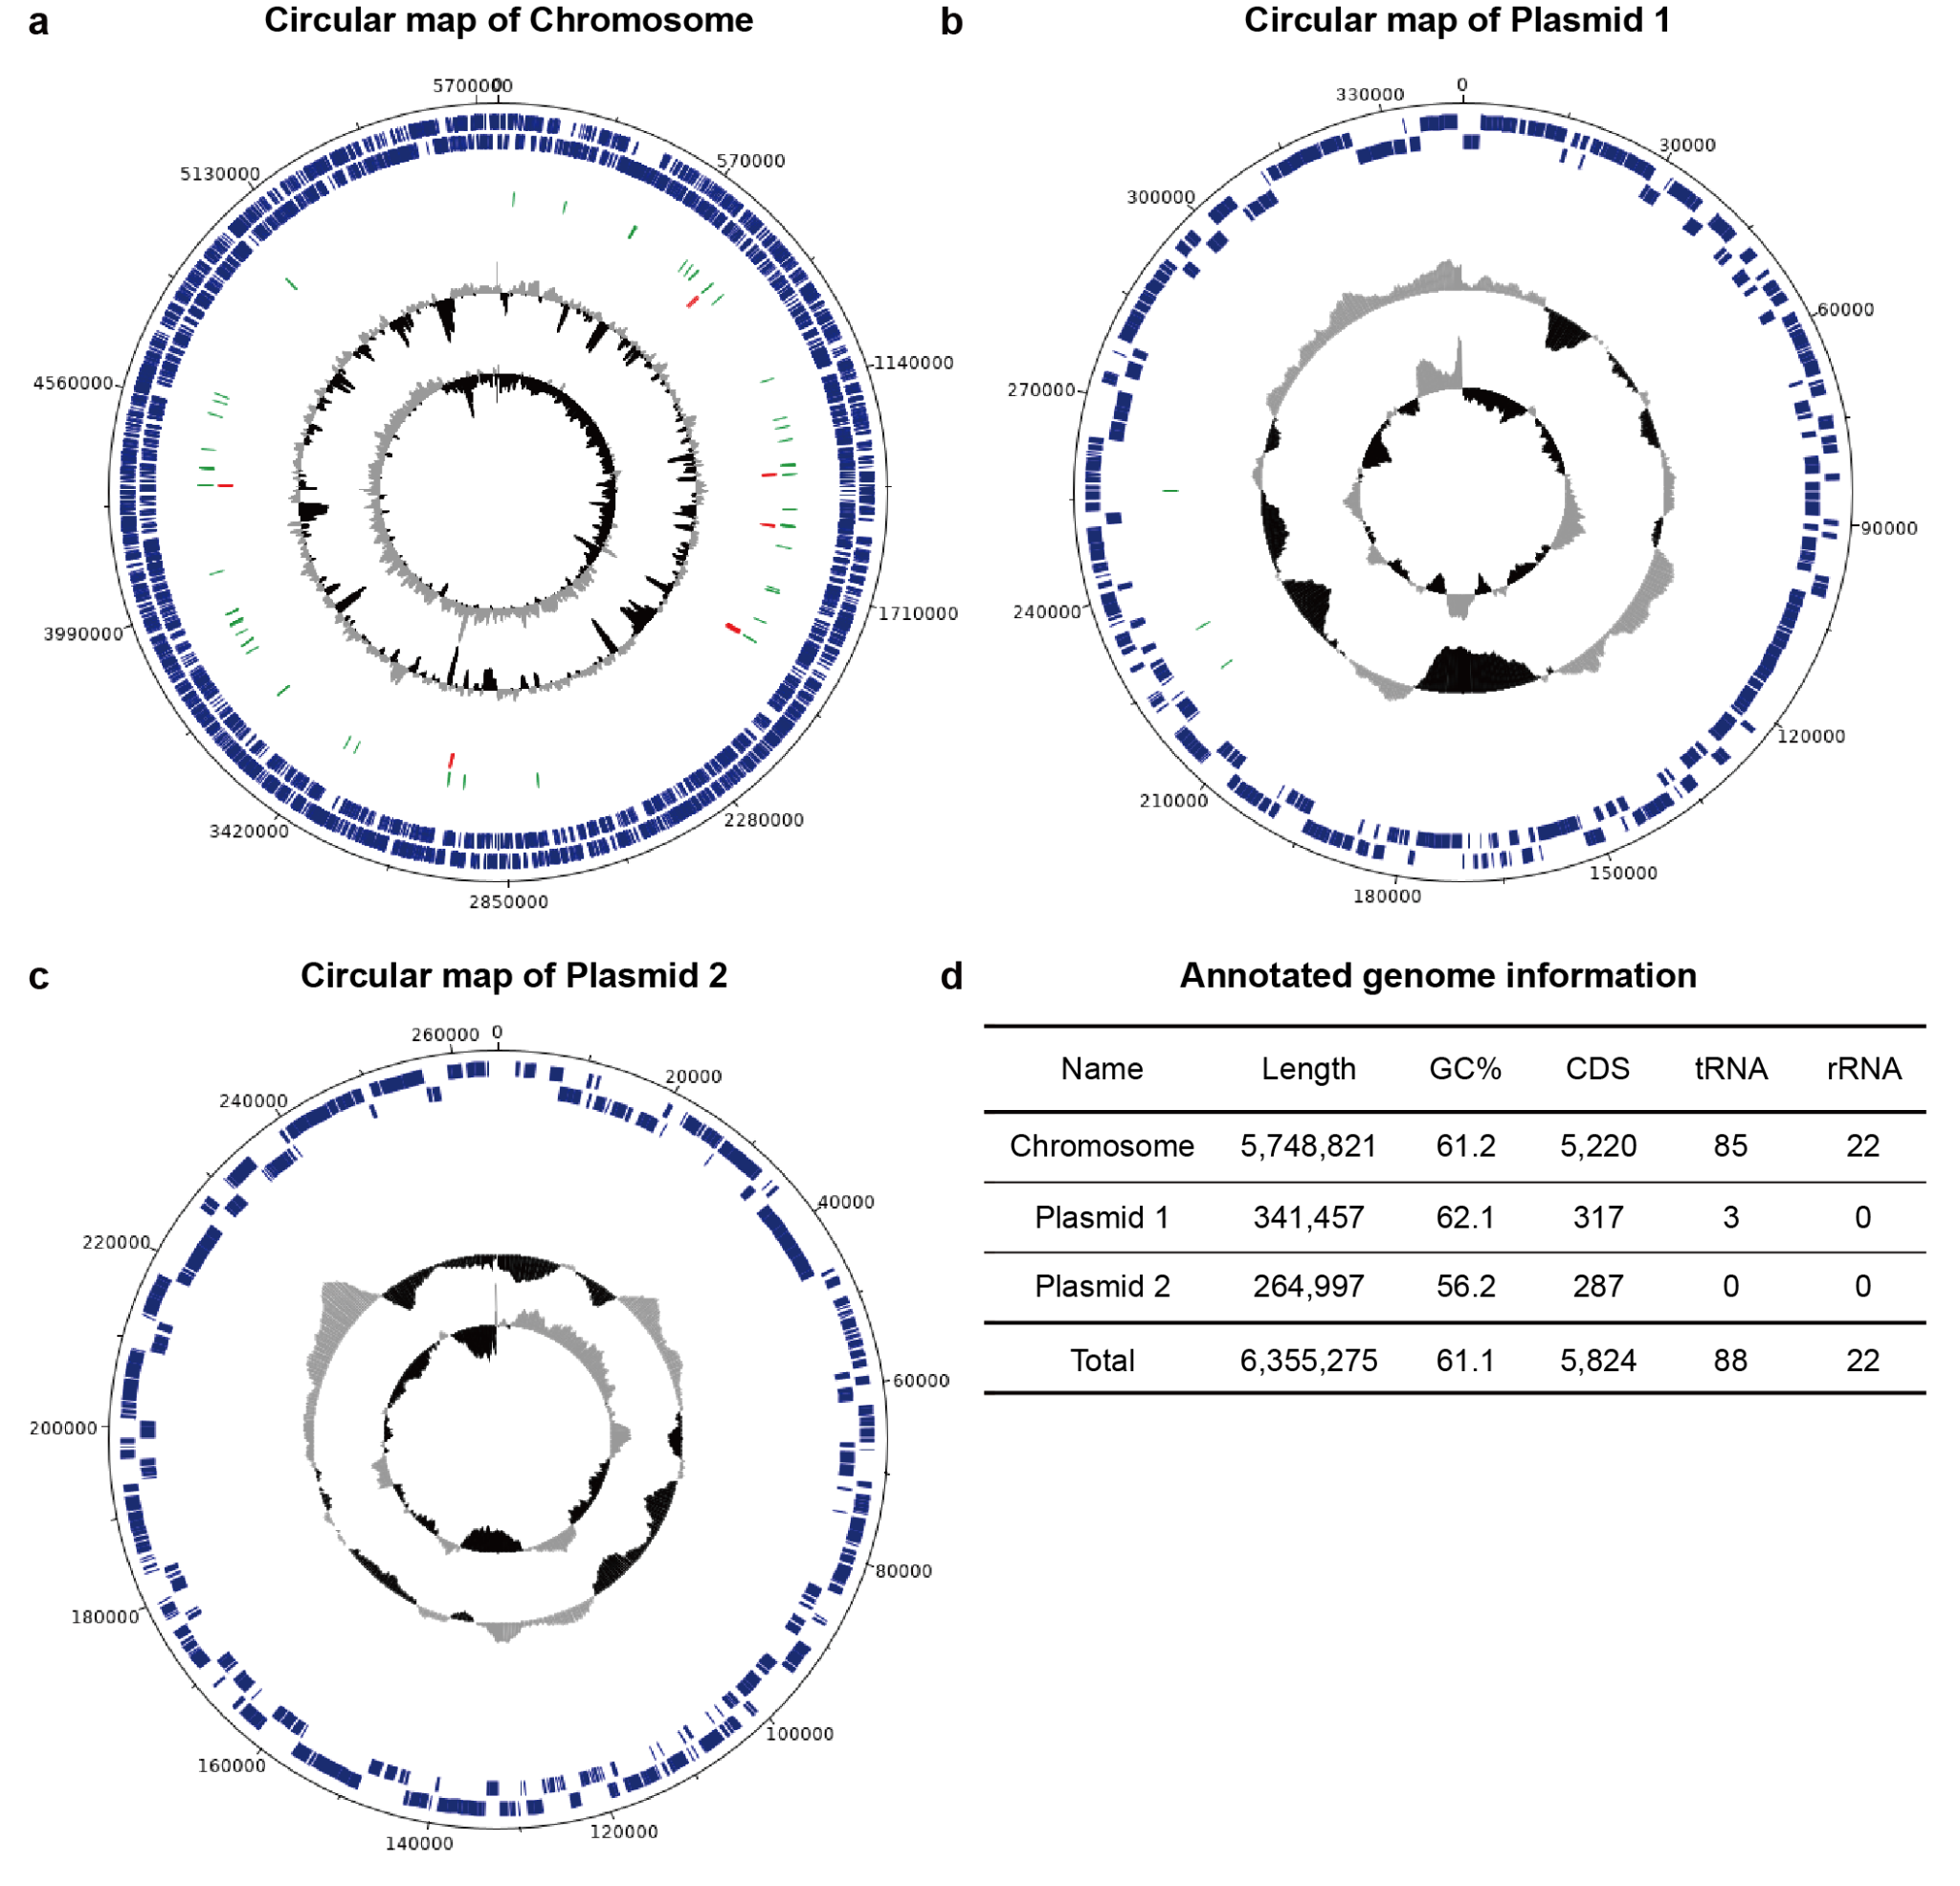


## Supplementary Figure 5. Genome information of *Pseudomonas* *postechii* TPA1

**a-c** Circular maps of **a** chromosome, **b** plasmid 1, and **c** plasmid 2 in *P. postechii* TPA1. Starting from the outer circle, the forward coding sequence (dark blue, outer circle), reverse coding sequence (dark blue, inner circle), tRNA (green), rRNA (red), GC plot (black: below average, grey: above average), and GC skew (black: below average, grey: above average) are depicted. The images were drawn using DNAplotter (https://www.sanger.ac.uk/science/tools/dnaplotter). **d** Annotated genome information, analysed by Rapid Annotations using the Subsystems Technology (RAST) server.

##
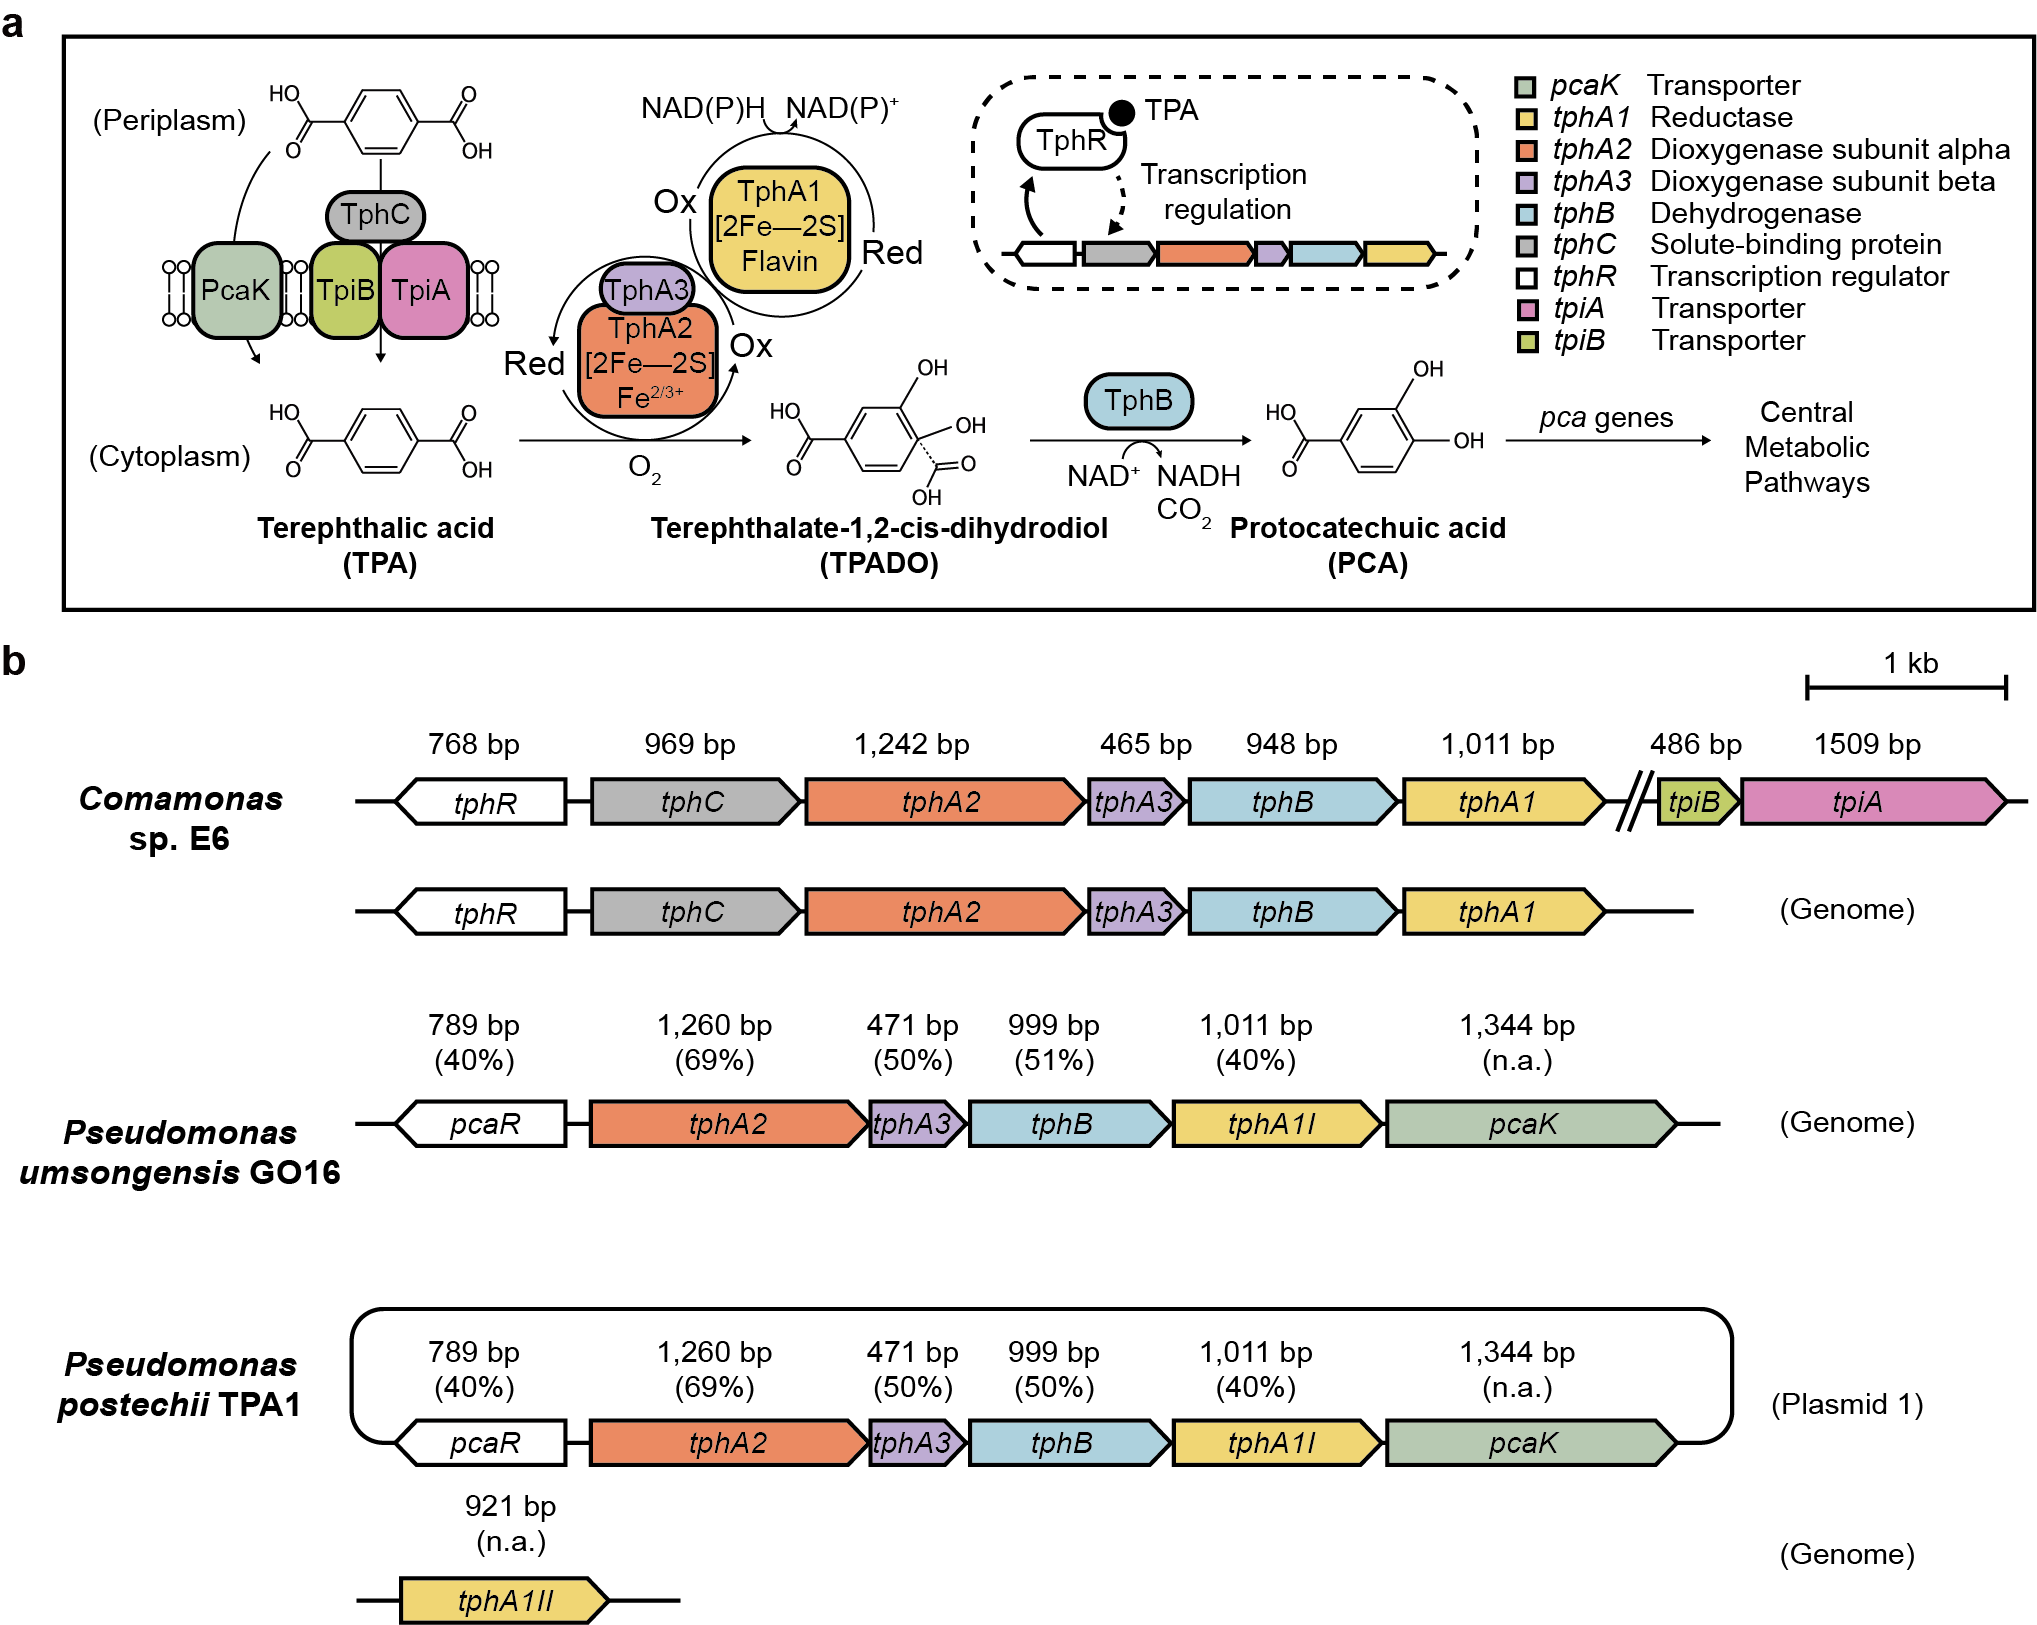


## Supplementary Figure 6. Comparison of *tph* operon between TPA-converting bacteria

**a** The pathway for transport and enzymatic conversion of TPA into protocatechuate and TPA-induced regulation of *tph* expression[1,2](https://sciwheel.com/work/citation?ids=13281433,7661178&pre=&pre=&suf=&suf=&sa=0,0). The name of each gene and the translated product corresponding to the color are annotated. **b** The organization of genes within *tph* operon across *Comamonas* sp. E6, *P. umsongensis* GO16, and *P. postechii* TPA1 are compared in parallel, and their genomic locations, lengths, identities are indicated. Identities between corresponding genes were calculated using BLASTp (https://blast.ncbi.nlm.nih.gov/).

##
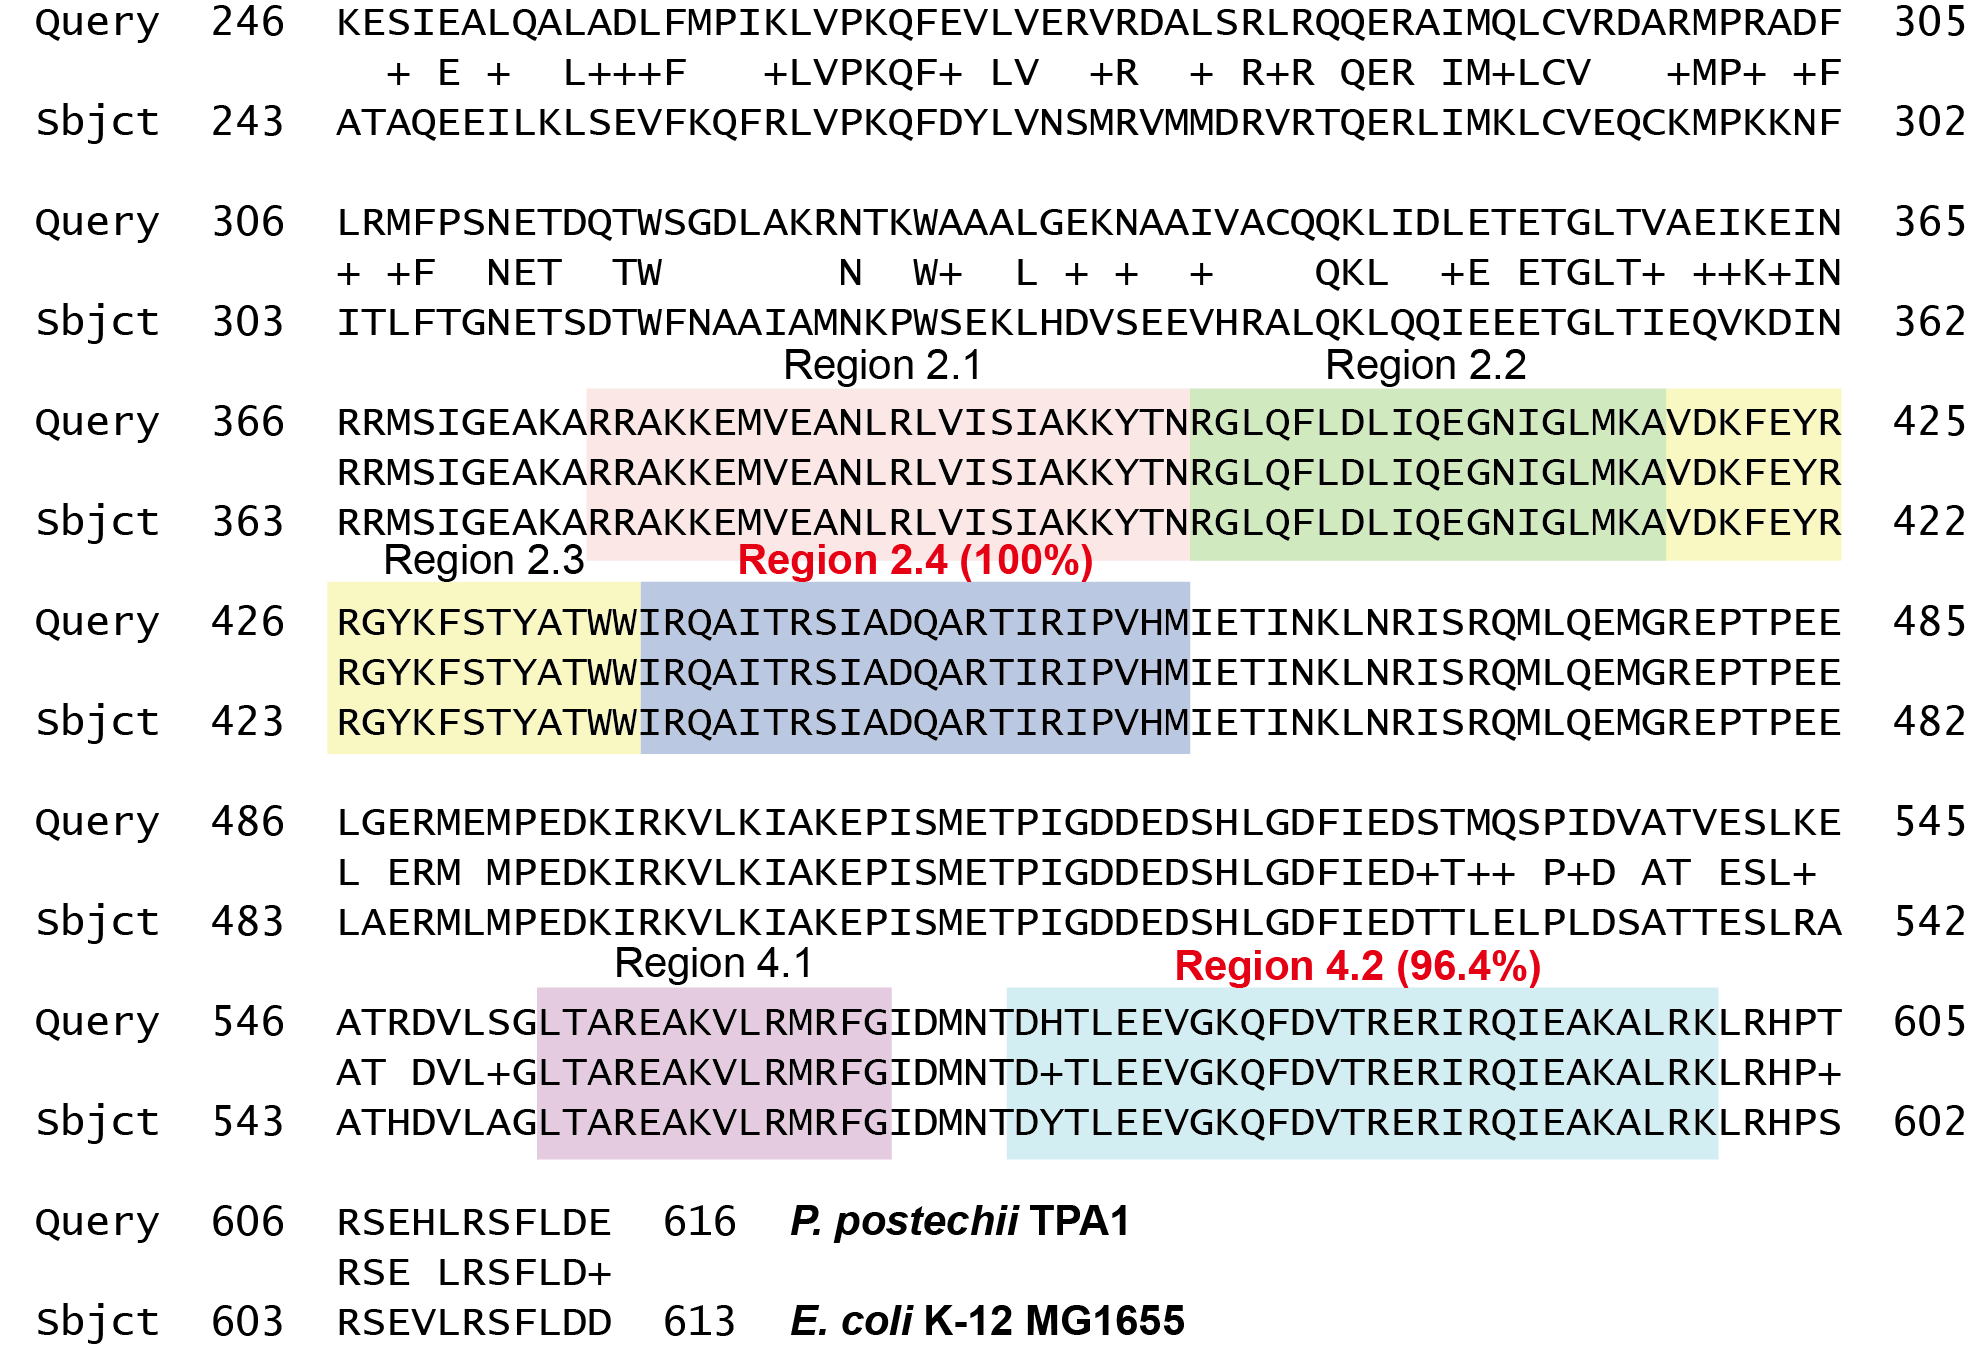


## Supplementary Figure 7. Sequence alignment of housekeeping sigma factor σ70 from *E. coli* and *P. postechii* TPA1

A partial σ70 amino acid sequence of TPA1 was compared with that of *E. coli*. Regions 2.4 and 4.2 of *E. coli* σ70 are known to interact with the -10 and -35 boxes of the promoter[3,4](https://sciwheel.com/work/citation?ids=914811,4746277&pre=&pre=&suf=&suf=&sa=0,0). Sequence alignment was performed using BLAST (<https://blast.ncbi.nlm.nih.gov/Blast.cgi>).

**
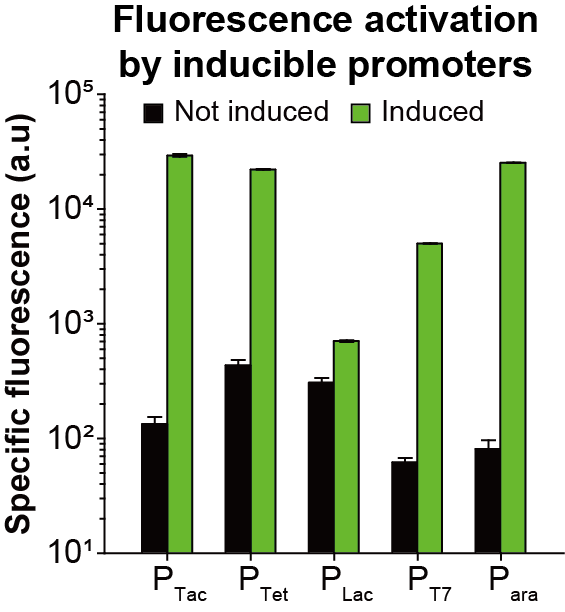
**

## Supplementary Figure 8. GFP expression regulation under common inducible promoters in *Pseudomonas postechii* TPA1

Specific fluorescence of GFP expressed under various inducible promoters in *Pseudomonas postechii* TPA1 is measured with (green bar) and without (black bar) inducers. The cells were cultured in 3 mL minimal medium with TPA as the sole carbon source (66 mM), and their specific fluorescence was measured at 12 h. The corresponding inducer (1 mM IPTG for Ptac, Plac, PT7, 100 μg/L anhydrotetracycline for Ptet, 10 g/L arabinose for Para) was added at the beginning of the culture. Expression of the GFP gene was activated by 221, 51, 2, 81, and 314-fold, under Ptac, Ptet, Plac, PT7, Para, respectively. Error bar indicates the standard deviations of three independent cultures (*n* = 3).


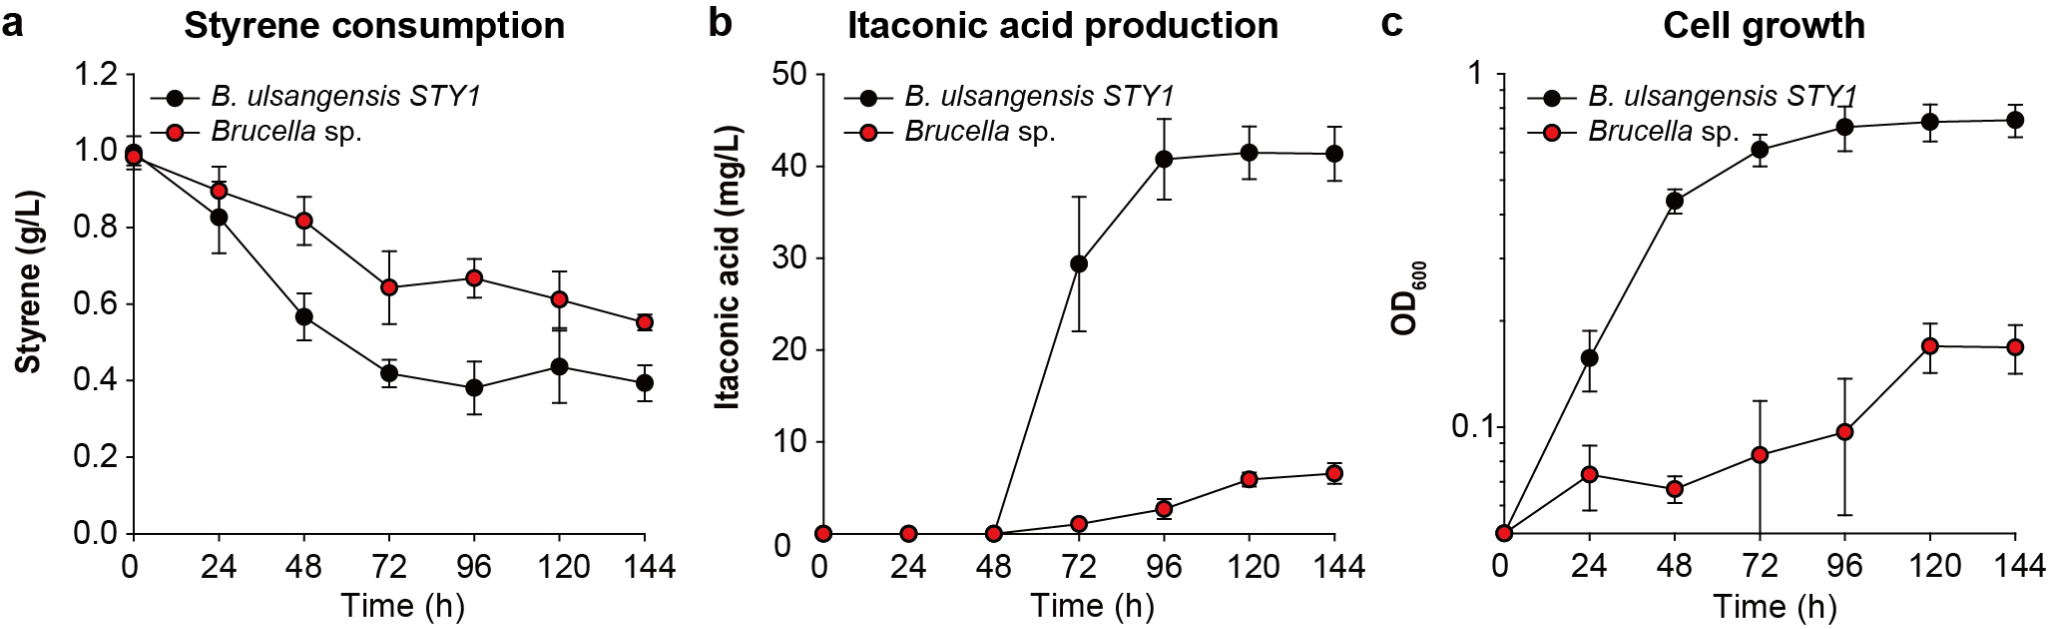


## Supplementary Figure 9. Comparison of two *Brucella* species isolated from the final SCOUT population

**a** Styrene consumption, **b** itaconic acid titer, and **c** cell growthin *B. ulsangensis* STY1 (black) and the other *Brucella* species (red). Error bar indicates the standard deviations of three independent cultures (*n* = 3).


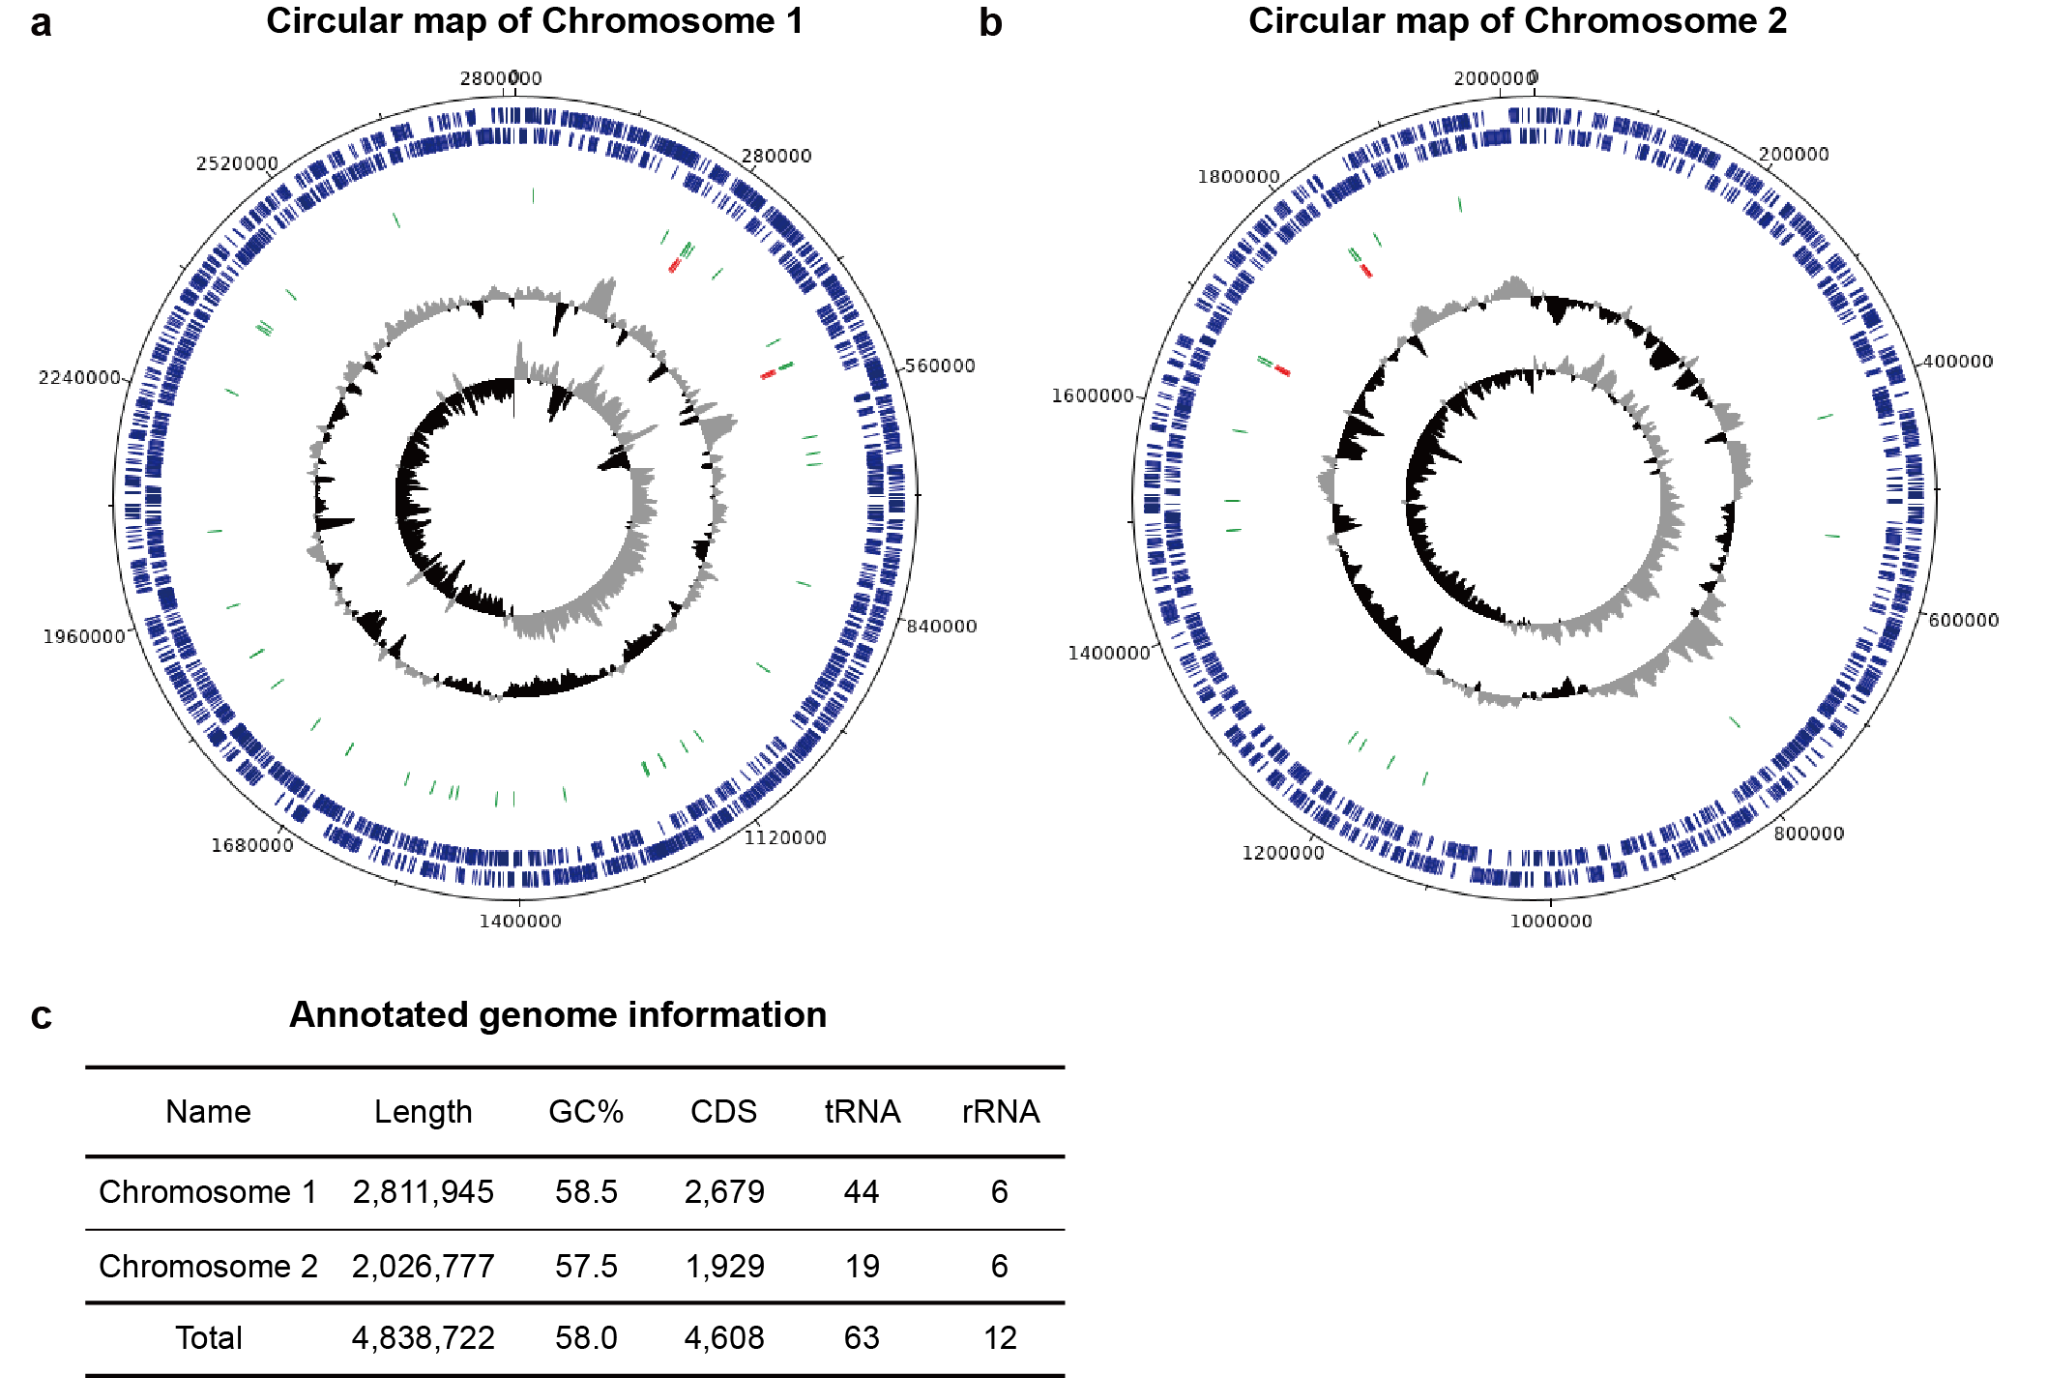


## Supplementary Figure 10. Genome information of *Brucella* *ulsangensis* STY1

Circular maps of **a** chromosome 1, **b** chromosome 2. Starting from the outer circle, the forward coding sequence (dark blue, outer circle), reverse coding sequence (dark blue, inner circle), tRNA (green), rRNA (red), GC plot (black: below average, grey: above average), and GC skew (black: below average, grey: above average) are depicted. The images were drawn using DNAplotter (https://www.sanger.ac.uk/science/tools/dnaplotter). **c** Annotated genome information, analysed by Rapid Annotations using the Subsystems Technology (RAST) server.

##
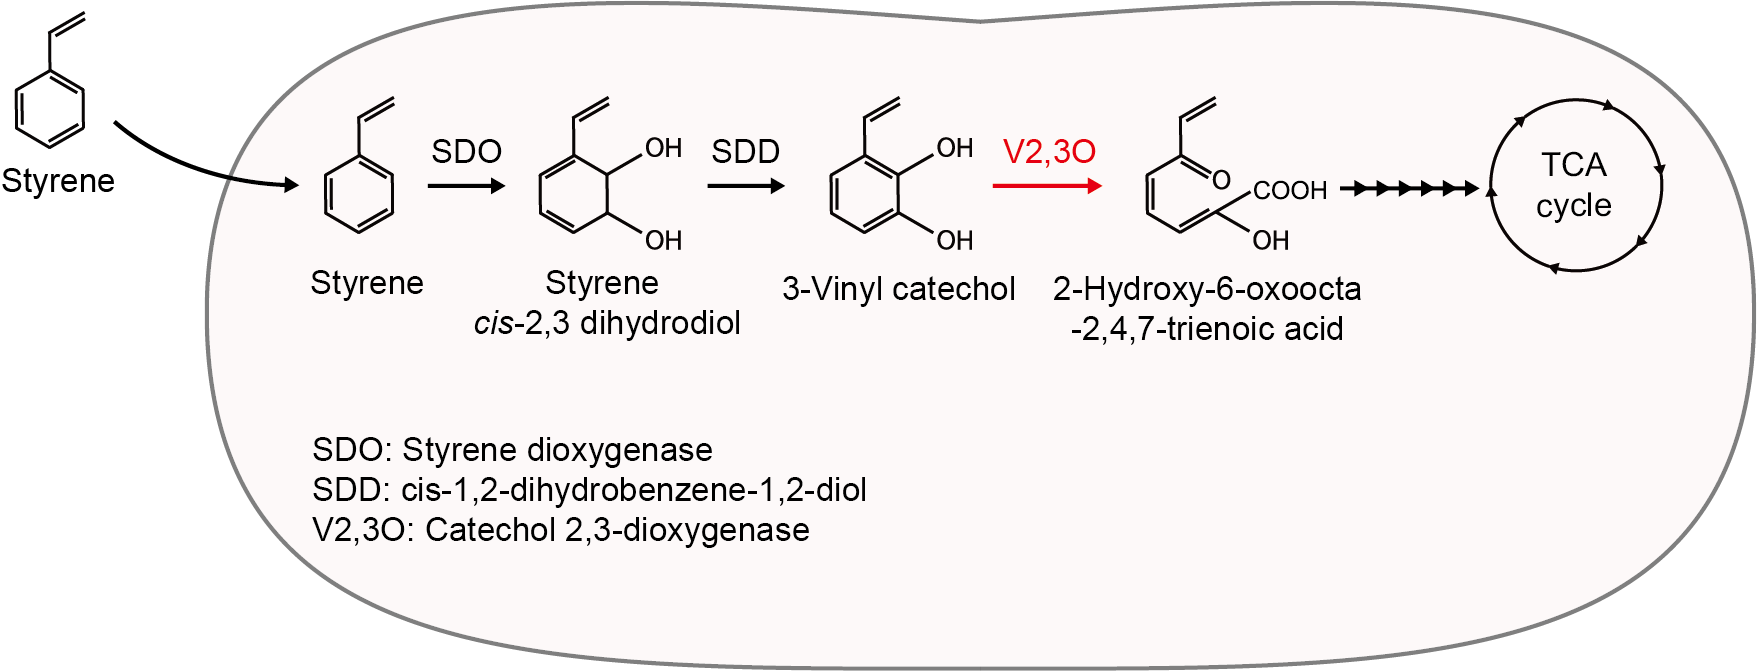


## Supplementary Figure 11. Putative styrene-converting pathway of *Brucella ulsangensis* STY1

The styrene converting pathway by direct ring cleavage[5](https://sciwheel.com/work/citation?ids=17731567&pre=&suf=&sa=0). Catechol 2,3-dioxygenase (Locus_tag: STP1_01556) indicated in red was sampled from annotated genes of STY1using de novo assembly of the whole genome. KAAS (KEGG Automatic Annotation Server, https://www.genome.jp/tools/kaas/) was used to identify putative styrene-degrading genes by comparison with genomic data of 12 different *Brucella* species.


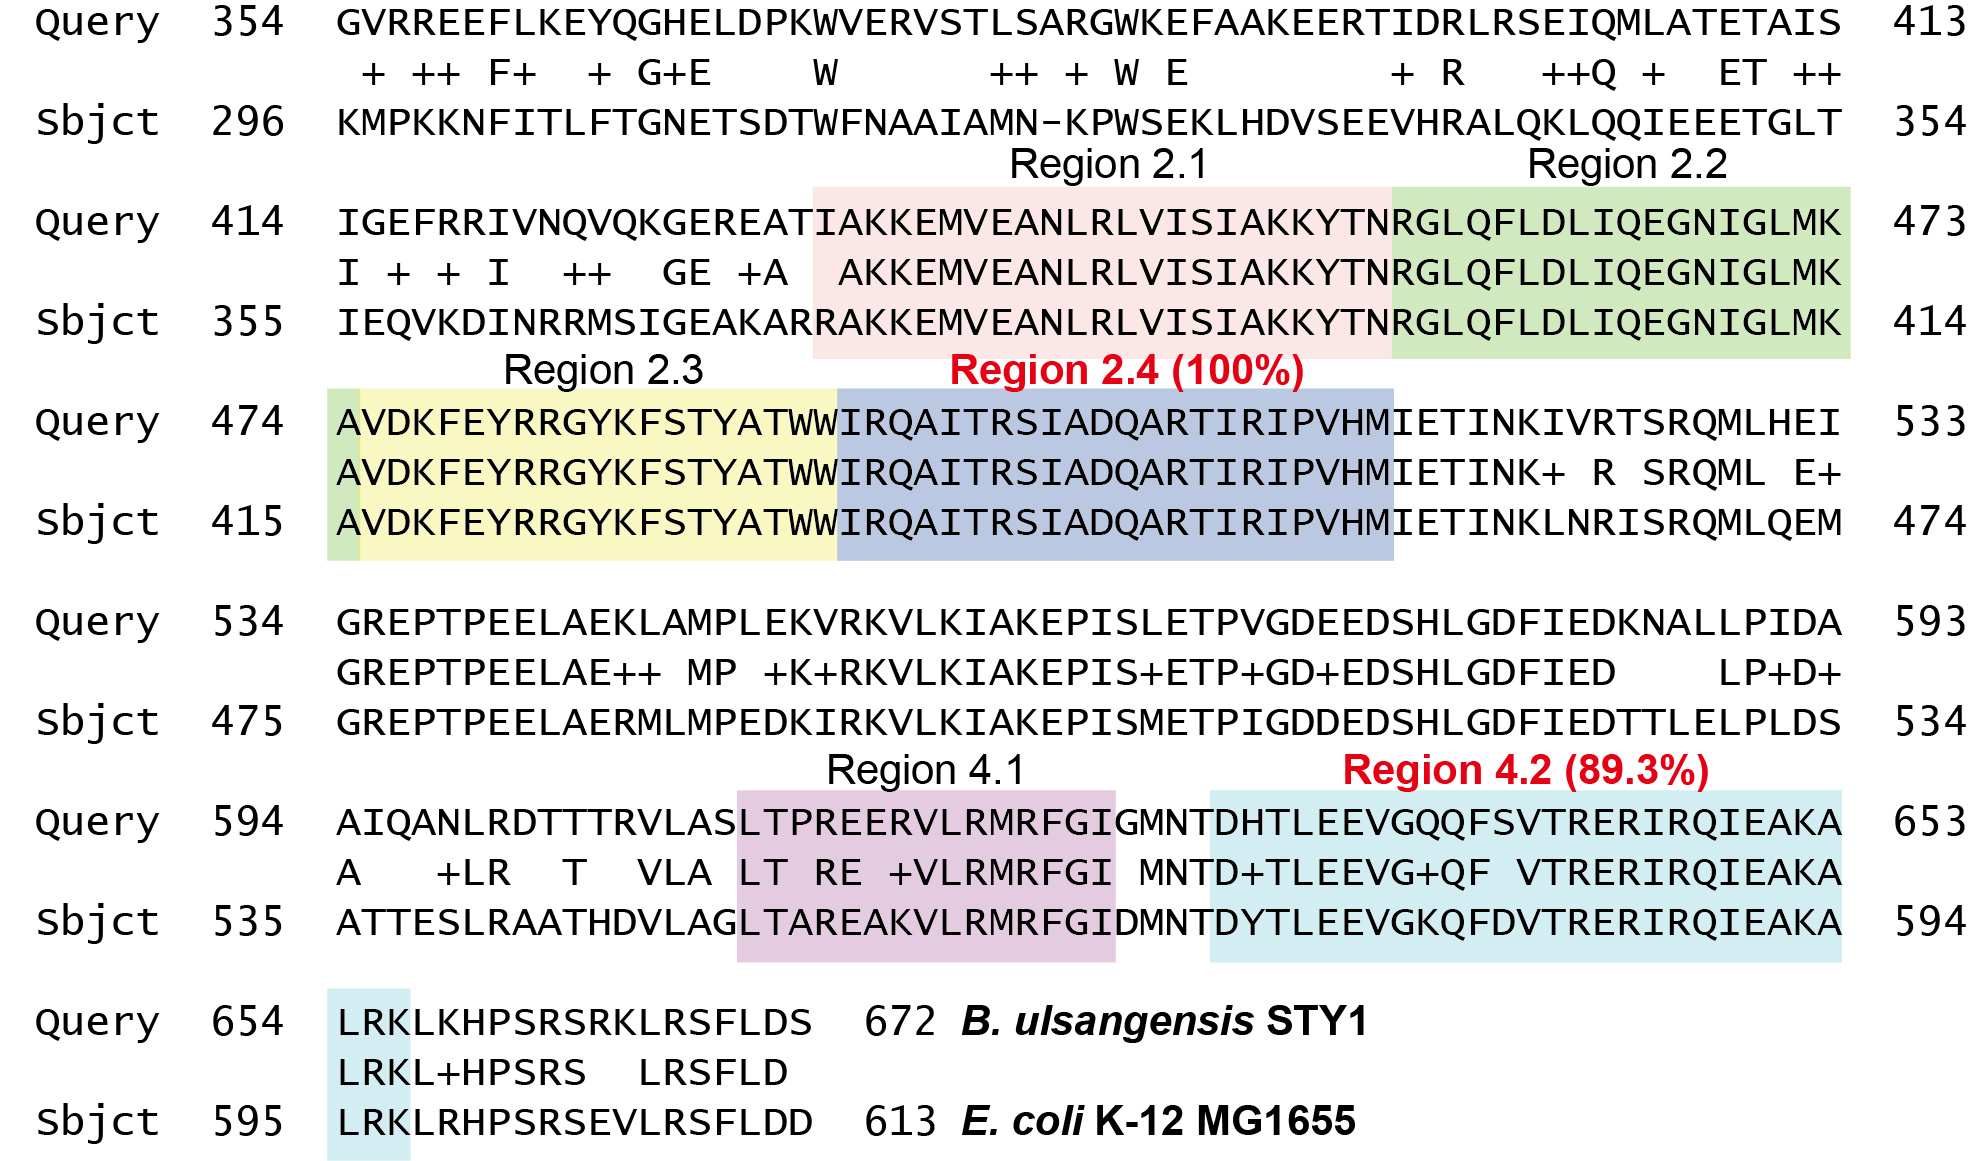


## Supplementary Figure 12. Sequence alignment of housekeeping sigma factor σ70 from *Escherichia coli* and *Brucella ulsangenesis* STY1

A partial σ70 amino acid sequence of *Brucella ulsangenesis* STY1 was aligned with that of *E. coli*. Regions 2.4 and 4.2 of *E. coli* σ70 are known to interact with the -10 and -35 boxes of the promoter[3,4](https://sciwheel.com/work/citation?ids=914811,4746277&pre=&pre=&suf=&suf=&sa=0,0). Sequence alignment was performed using BLAST (<https://blast.ncbi.nlm.nih.gov/Blast.cgi>).

##
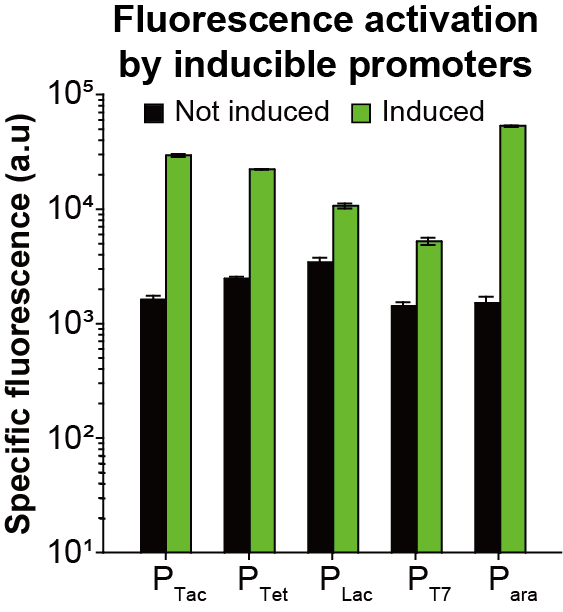


## Supplementary Figure 13. Expression of GFP under the control of various inducible promoters in *Brucella ulsangenesis* STY1

Specific fluorescence of GFP expressed under various inducible promoters in STY1 is measured with (green bar) and without (black bar) induction. The culture was performed in serum bottles with 10 mL MSM medium supplemented with 1 g/L of styrene and 2 g/L of yeast extract. Specific fluorescence was measured 12 hours after the start of the culture. Inducer was added at the beginning of the culture, resulting in 14.7, 9.0, 3.1, 3.7, and 34.9-fold increased fluorescence, respectively (Tac, Tet, Lac, T7, ara). Error bar indicates the standard deviations of three independent cultures (n = 3).

# Supplementary Tables

## Supplementary Table 1. List of strains and plasmids used in this study

| **Names** | **Description** | **Resources** |
| --- | --- | --- |
| **Strains** |  |  |
| *E. coli* Mach-T1R | F– φ80(*lac*Z)ΔM15Δ*lac*X74 *hsd*R(rK–mK+) Δ*rec*A1398 *end*A1 *ton*A | Invitrogen |
| *Pseudomonas postechii* TPA1 | A novel environmental isolate | This study |
| TPA-ITA | *P. postechii* TPA1/ pSCOUT | This study |
| TPA-Indigo | *P. postechii* TPA1/ pIND | This study |
| *Brucella ulsangenesis* STY1 | A novel environmental isolate | This study |
| STY1-ITA | *B. ulsangnesis* STY1/ pSCOUT | This study |
| STY1-Indigo | *B. ulsangnesis* STY1/ pIND | This study |
| *E. coli* S17-1 λ pir | F– recA thi pro hsdR– hsdM+ RP4-2-Tc::Mu-Km::Tn7 λpir | ATCC BAA-2428 |
| S17 Δ*asd* | *E. coli* S17-1 λ pir Δ*asd* | This study |
| TPA-tac | *P. postechii* TPA1/ pRtac | This study |
| TPA-tet | *P. postechii* TPA1/ pRtet | This study |
| TPA-lac | *P. postechii* TPA1/ pRlac | This study |
| TPA-ara | *P. postechii* TPA1/ pRara | This study |
| TPA-T7 | *P. postechii* TPA1/ pRT7 | This study |
| STY-tac | *B. ulsangnesis* STY1/ pRtac | This study |
| STY-tet | *B. ulsangnesis* STY1/ pRtet | This study |
| STY-lac | *B. ulsangnesis* STY1/ pRlac | This study |
| STY-ara | *B. ulsangnesis* STY1/ pRara | This study |
| STY-T7 | *B. ulsangnesis* STY1/ pRT7 | This study |
| *E. coli* W | Strain for itaconic acid sensor validation | ATCC 9637 |
| W-SENS | *E. coli* W/ pSENS | This study |
|  |  |  |
| **Plasmids** |  |  |
| pACYCDuet_1  pRSF1010 | p15A, LacI, CmR, *E. coli* expression vector  oriV, SmR, Broad host range plasmids | Novagen  [6](https://sciwheel.com/work/citation?ids=6057169&pre=&suf=&sa=0) |
| pRC | pRSF1010/ CmR, KmR, Selection marker exchanged | This study |
| pSENS | pRC / PJ23106_*ictR_*TBBa_B1001, Pcc1_*sgfp* TBBa_B1001*, oriT,* | This study |
| pSCOUT | pSENS / PJ23100*_ cad_* P J23108*_prpD* _TBBa_B1001 | This study |
| pRtac | pRC / Ptac*_ sgfp,* LacI | This study |
| pRtet | pRC / P J23109*_tetR*_TBBa_B1002*,* PLtet0*_ sgfp* _TBBa_B1001 | This study |
| pRlac | pRC / Plac*_ sgfp* _TBBa_B1001*,* LacI | This study |
| pRara | pRC / P araC*_araC*, Para*_ sgfp* _TBBa_B1001*,* LacI | This study |
| pRT7 | pRC / PT7*_ sgfp* _T7, Plac_ *T7 RNAP,* LacI | This study |
| pIND | pRC / P J23100*_sfp* _T7, P J23100_*bpsA*_TBBa_B1001 | This study |
| pKD46 | AmpR, Red recombinase expression vector | [7](https://sciwheel.com/work/citation?ids=69897&pre=&suf=&sa=0) |
| pCP20 | CmR, Flippase expression vector | [7](https://sciwheel.com/work/citation?ids=69897&pre=&suf=&sa=0) |

## Supplementary Table 2. Designed 5’ UTR sequences and their predicted expression levels in this study

| **Gene** | **5′ UTR sequence (5′-3′)a** | **Predicted expression levelb (a.u.)** |
| --- | --- | --- |
| *itcR* | AAAAACACAAAAAGGAGCATCTAAA | 510,075 |
| *cad* | AAAGCGGAAAGTAAGGAGGTTAGAT | 911,518 |
| *prpD* | CAACAAAAAAAAAGGAGCATCCTAC | 620,368 |
| *sgfp* (Pccl) | TTCTGCATACAAAGGAGCATCCCCA | 1,026,267 |
| *sgfp* (Plac, Ptac, PT7) | AGCGGATAACAATTACGAGGGAAAG | 1,828,513 |
| *sgfp* (Ptet, Para) | ATTGCGTGAGAAAGGAGCATCGGGA | 2,064,841 |
| *T7 RNAP* | GCGGATAACAATTAAGGAGTCCGCG | 16,662 |
| *tetR* | AGCCGAAGTCTCGAAGGAGCAGGCG | 94,345 |
| *sfp* | TACAACTCGGAAAGAGTTAGAGACA | 1,970 |
| *bpsA* | GCCTATTATCAATTATCAATTCCCT | 367,464 |

aUnderlined sequences overlap with the lac operator.

**b**Values were calculated using UTR Designer (<https://sbi.postech.ac.kr/utr_designer>).

## Supplementary Table 3. Growth performance of reported TPA-consuming bacteria

| **Strainsa** | **Origin/ Engineering strategy** | **μmaxb,c** | **Noted** | **References** |
| --- | --- | --- | --- | --- |
| *P. postechii* TPA1 | An environmental isolate | 0.78 h-1 | 44 mM TPA in 12 h | This study |
| *Acinetobacter baylyi* ADP1(IP250) | Introduction of TPA degrading genes (*tph*) from *Commamonas* sp. E6  Evolved by adaptive laboratory engineering | 0.26 h-1 | 10 mM TPA in 12 h | [8](https://sciwheel.com/work/citation?ids=12695772&pre=&suf=&sa=0) |
| ~0.23 h-1 | n.a. | [8,9](https://sciwheel.com/work/citation?ids=11402113,12695772&pre=&pre=&suf=&suf=&sa=0,0) |
| *P. putida* KT2440  (*tph* operon) | Introduction of TPA degrading genes (*tph*) from *Commamonas* sp. E6 | 0.57 h-1 | 45 mM TPA in 38 h | [9](https://sciwheel.com/work/citation?ids=11402113&pre=&suf=&sa=0) |
| *P. putida sp.* | Introduction of TPA degrading genes (*tph*) from *R. jostii* RHA1  Deletion of *ped* operon | n.a. | 56.2 mM TPA in 36 h | [10](https://sciwheel.com/work/citation?ids=15420579&pre=&suf=&sa=0) |
| *Commamona*s sp. E6 | An environmental isolate | ~0.20 h-1 | n.a. | [8,9](https://sciwheel.com/work/citation?ids=11402113,12695772&pre=&pre=&suf=&suf=&sa=0,0) |
| 0. 50 h-1 | 10 mM TPA in ~15 h | [8,9](https://sciwheel.com/work/citation?ids=11402113,12695772&pre=&pre=&suf=&suf=&sa=0,0) |
| *Comamonas testosteroni* KF-1 | Introduction of f PDC producing genes (2-pyrone-4,6-dicarboxylic acid) | n.a. | ~22 mM TPA in 20 h | [11](https://sciwheel.com/work/citation?ids=17875365&pre=&suf=&sa=0) |
| *P. umsongnesis* GO16 | An environmental isolate | 0.17 h-1 | 44 mM TPA and 44 mM ethylene glycol in 12 h (5-L scale) | [12](https://sciwheel.com/work/citation?ids=10902174&pre=&suf=&sa=0) |
| n.a. | 15~18 mM TPA in 10 h | [13](https://sciwheel.com/work/citation?ids=11415861&pre=&suf=&sa=0) |
| *Rhodococcus jostii* RHA1 | An environmental isolate | ~0.20 h-1 | n.a. | [8,9](https://sciwheel.com/work/citation?ids=11402113,12695772&pre=&pre=&suf=&suf=&sa=0,0) |
| *Rhodococcus jostii* PET | An environmental isolate | n.a. | ~ 44 mM TPA and 44 mM ethylene glycol (PET hydrolysates) in 36 h | [14](https://sciwheel.com/work/citation?ids=15336263&pre=&suf=&sa=0) |

aAll strains were capable of utilizing TPA as a sole carbon source

**b**All strains were cultured at flask scale in minimal medium at 30℃ unless otherwise mentioned.

**c**n.a. Not available from related literature

**d**Time required for complete consumption of TPA

# References

[1. Kincannon, W. M. *et al.* Biochemical and structural characterization of an aromatic ring-hydroxylating dioxygenase for terephthalic acid catabolism. *Proc Natl Acad Sci USA* **119**, e2121426119 (2022).](https://sciwheel.com/work/bibliography/13281433)

[2. Hosaka, M. *et al.* Novel tripartite aromatic acid transporter essential for terephthalate uptake in Comamonas sp. strain E6. *Appl. Environ. Microbiol.* **79**, 6148–6155 (2013).](https://sciwheel.com/work/bibliography/7661178)

[3. Paget, M. S. B. & Helmann, J. D. The sigma70 family of sigma factors. *Genome Biol.* **4**, 203 (2003).](https://sciwheel.com/work/bibliography/914811)

[4. Bervoets, I. *et al.* A sigma factor toolbox for orthogonal gene expression in Escherichia coli. *Nucleic Acids Res.* **46**, 2133–2144 (2018).](https://sciwheel.com/work/bibliography/4746277)

[5. Oelschlägel, M., Zimmerling, J. & Tischler, D. A Review: The Styrene Metabolizing Cascade of Side-Chain Oxygenation as Biotechnological Basis to Gain Various Valuable Compounds. *Front. Microbiol.* **9**, 490 (2018).](https://sciwheel.com/work/bibliography/17731567)

[6. Scholz, P. *et al.* Complete nucleotide sequence and gene organization of the broad-host-range plasmid RSF1010. *Gene* **75**, 271–288 (1989).](https://sciwheel.com/work/bibliography/6057169)

[7. Datsenko, K. A. & Wanner, B. L. One-step inactivation of chromosomal genes in *Escherichia coli* K-12 using PCR products. *Proc Natl Acad Sci USA* **97**, 6640–6645 (2000).](https://sciwheel.com/work/bibliography/69897)

[8. Pardo, I. *et al.* Gene amplification, laboratory evolution, and biosensor screening reveal MucK as a terephthalic acid transporter in Acinetobacter baylyi ADP1. *Metab. Eng.* **62**, 260–274 (2020).](https://sciwheel.com/work/bibliography/12695772)

[9. Werner, A. Z. *et al.* Tandem chemical deconstruction and biological upcycling of poly(ethylene terephthalate) to β-ketoadipic acid by Pseudomonas putida KT2440. *Metab. Eng.* **67**, 250–261 (2021).](https://sciwheel.com/work/bibliography/11402113)

[10. Bao, T., Qian, Y., Xin, Y., Collins, J. J. & Lu, T. Engineering microbial division of labor for plastic upcycling. *Nat. Commun.* **14**, 5712 (2023).](https://sciwheel.com/work/bibliography/15420579)

[11. Delmulle, T. *et al.* Engineering Comamonas testosteroni for the production of 2-pyrone-4,6-dicarboxylic acid as a promising building block. *Microb. Cell Fact.* **22**, 188 (2023).](https://sciwheel.com/work/bibliography/17875365)

[12. Narancic, T. *et al.* Genome analysis of the metabolically versatile Pseudomonas umsongensis GO16: the genetic basis for PET monomer upcycling into polyhydroxyalkanoates. *Microb. Biotechnol.* **14**, 2463–2480 (2021).](https://sciwheel.com/work/bibliography/10902174)

[13. Tiso, T. *et al.* Towards bio-upcycling of polyethylene terephthalate. *Metab. Eng.* **66**, 167–178 (2021).](https://sciwheel.com/work/bibliography/11415861)

[14. Diao, J., Hu, Y., Tian, Y., Carr, R. & Moon, T. S. Upcycling of poly(ethylene terephthalate) to produce high-value bio-products. *Cell Rep.* **42**, 111908 (2023).](https://sciwheel.com/work/bibliography/15336263)
